# Supplementary material for: Water-mediated reduction of [Cu(dmp)2(CH3CN)]2+: implications of the structure of a classical complex on its activity as an anticancer drug
Source: Royal Society of Chemistry journal article supplement (doi:10.1039/d1qi00233c), 2021-01-01
Supplement: d1qi00233c1.pdf [file d1qi00233c1.pdf]

## Supplementary data

### Water-mediated reduction of $[\text{Cu}(\text{dmp})_2(\text{CH}_3\text{CN})]^{2+}$ : Implications of the structure of a classical complex on its activity as an anticancer drug

Pedro Levín,<sup>†[a]</sup> María C. Ruiz,<sup>†[b]</sup> Adolfo I. B. Romo,<sup>[c]</sup> Otaciro R. Nascimento,<sup>[d]</sup> Ana L. Di Virgilio,<sup>[b]</sup> Allen G. Oliver,<sup>[e]</sup> Alejandro P. Ayala,<sup>[f]</sup> Izaura C. N. Diogenes,<sup>\*[c]</sup> Ignacio E. León,<sup>\*[b]</sup> Luis Lemus<sup>\*[a]</sup>

---

[a] Departamento química de los materiales, Facultad de Química y Biología, Universidad de Santiago de Chile, Av. Libertador Bernardo O'Higgins 3363, Estación Central, Santiago, Chile.  
E-mail: luis.lemus@usach.cl

[b] Centro de Química Inorgánica CEQUINOR (CONICET-UNLP), Bv 120 1465 1900, La Plata, Argentina.  
E-mail: ileon@biol.unlp.edu.ar

[c] Departamento de Química Orgânica e Inorgânica Universidade Federal do Ceará, Cx. Postal 6021 Fortaleza, CE, 60451-970, Brazil.  
E-mail: izaura@dqoi.ufc.br

[d] Departamento de Física Interdisciplinar, Instituto de Física de São Carlos Universidade de São Paulo, CP 369, CEP 13560-970 São Carlos, SP, Brazil.

[e] Department of Chemistry and Biochemistry, University of Notre Dame, 46556-5670 Notre Dame, IN, USA.

[f] Departamento de Física Universidade Federal do Ceará, Fortaleza, CE, 65455-900, Brazil.

† Coauthors contributed equally to this work.

\* Corresponding Authors:

**Luis Lemus**, e-mail: luis.lemus@usach.cl

**Ignacio E. León**, e-mail: ileon@biol.unlp.edu.ar

**Izaura C. N. Diogenes**, e-mail: izaura@dqoi.ufc.br

## Crystallographic structures

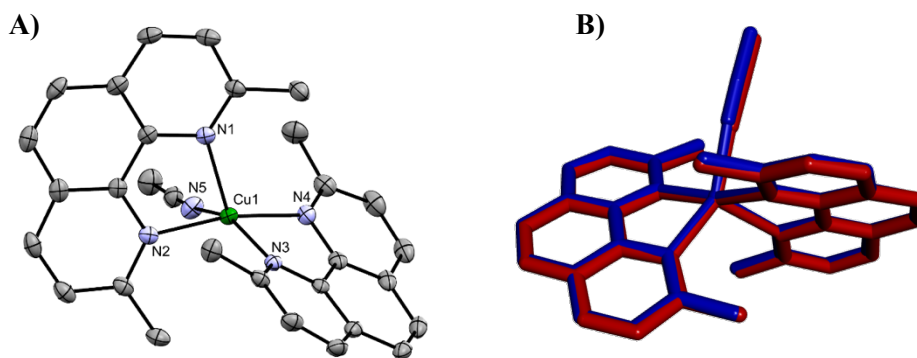

**Figure S1.** A) ORTEP diagram of the molecular structure of  $[\text{Cu}(\text{dmp})(\text{CH}_3\text{CN})](\text{ClO}_4)_2$  reported in this work. B) Overlay of the structure of this work (red) with the previously reported (blue).<sup>1</sup>

## EPR and UV-vis measurements

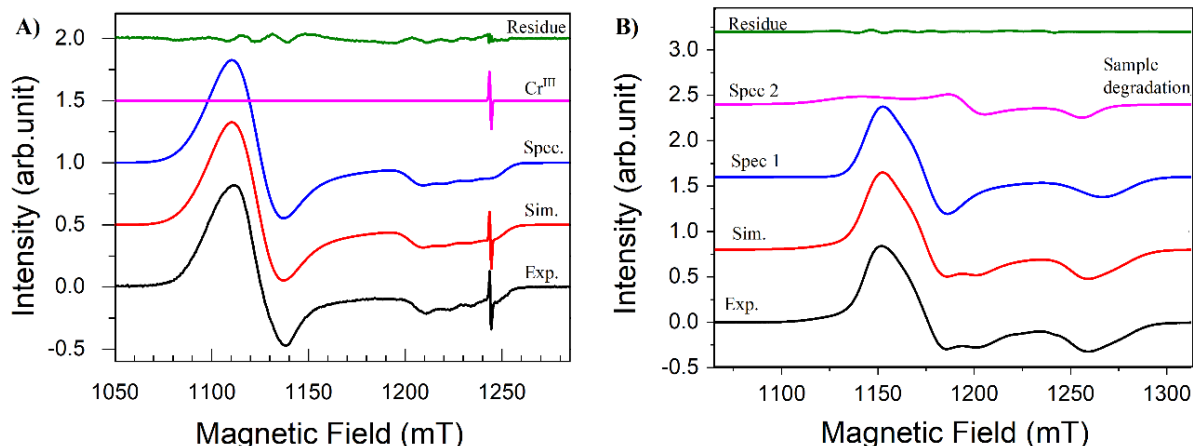

**Figure S2.** EPR spectra in solid state of A)  $[\text{Cu}(\text{dmp})_2(\text{CH}_3\text{CN})](\text{ClO}_4)_2$  and B)  $[\text{Cu}(\text{phen})_2(\text{CH}_3\text{CN})](\text{ClO}_4)_2$ . Experimental in black line, simulated spectra in red line and principal species in blue line. Spectral simulations were made with the EasySpin program.<sup>2</sup> The pink line in the A figure corresponds to  $\text{MgO}:\text{Cr}^{\text{III}}$  used as g marker ( $g=1.9797$ ) to calibrate the magnetic field.

EPR spectra of  $[\text{Cu}(\text{phen})_2(\text{ClO}_4)](\text{ClO}_4)_2$  and  $[\text{Cu}(\text{dmp})_2(\text{ClO}_4)](\text{ClO}_4)_2$  in the solid state were recorded at 298 K in a Varian E-110 Q-band instrument with a cylindrical cavity, and a frequency of 35.48950 and 34.47017 GHz, respectively. The sample (around 2 mg) was transferred to a quartz capillary tube (1 mm internal diameter) before being inserted into the spectrometer cavity; microwave power 10 mW; modulation amplitude 0.4 mT. Spectral simulations were made by using the EasySpin program.<sup>2</sup> The R parameter value was determined by using  $(g_y - g_z)/(g_x - g_y)$ .<sup>3,4</sup>

Both complexes show rhombic spectra, in agreement with a pentacoordinated  $\text{Cu}^{\text{II}}$  center in a geometry intermediate between TBPY-5 and SPY-5. For  $[\text{Cu}(\text{dmp})_2(\text{CH}_3\text{CN})](\text{ClO}_4)_2$ , calculated  $g$  tensor values are  $g_x=2.223$ ,  $g_y=2.193$ ,  $g_z=2.008$  and  $R=6.17$ . For  $[\text{Cu}(\text{phen})_2(\text{CH}_3\text{CN})](\text{ClO}_4)_2$   $g$  values are  $g_x=2.203$ ,  $g_y=2.156$ ,  $g_z=2.000$ , and  $R=3.32$ . The ground state in both compounds is composed by a linear combination of the  $d_{z^2}$  and  $d_{x^2-y^2}$  orbitals, however, the R parameters are indicative that the main contribution arises from the  $d_{z^2}$  orbital as the ground state,<sup>3</sup> which is related to geometries closer to the TBPY-5.

In  $[\text{Cu}(\text{phen})_2(\text{CH}_3\text{CN})](\text{ClO}_4)_2$  the geometry is closer to a TBPY-5 with each phenanthroline ligand providing an equatorial and an axial nitrogen around  $\text{Cu}^{\text{II}}$ . The fifth coordination site is occupied by a  $\text{CH}_3\text{CN}$  fragment. The calculated  $g_z$  value of is close to the free electron ( $g_e = g_{\text{free electron}} = 2.0023$ ), which also indicates that the unpaired electron is in  $d_{z^2}$ , due to the crystal field generated by the ligands in a TBPY-5 geometry. It was also possible to observe in the EPR spectrum, a small amount of sample corresponding to secondary species of  $\text{Cu}^{\text{II}}$  ( $g_x=2.228$ ,  $g_y=2.121$ ,  $g_z=2.018$ ,  $R = 0.95$ ) (fig. S2 B, pink line). Probably, the molecule undergoes an exchange of the fifth ligand for a molecule of water, which increases the contribution of the  $d_{x^2-y^2}$  orbital.<sup>3,5,6,7</sup> On the other hand, the solid was presumably not sufficiently magnetically diluted to yield EPR spectra indicative of the weak exchange between neighbor molecules, producing collapse of Cu nuclear ( $I = 3/2$ ) hyperfine lines.

For  $[\text{Cu}(\text{dmp})_2(\text{CH}_3\text{CN})](\text{ClO}_4)_2$ , the main contribution to the ground-state HOMO arises from the  $d_{z^2}$ , according to the R values calculated. However, this complex presents a slightly higher degree of distortion from the TBPY-5 geometry, mainly due to the steric hindrance imparted by the methyl groups in the dmp ligand. Furthermore, it was possible to obtain hyperfine couplings for this complex, presenting values  $A_x = 20.6$  G,  $A_y = 21.0$  G and  $A_z = 123.5$  G. The A parameters are typical of a  $\text{Cu}^{\text{II}}$  complex in a predominantly axially elongated five-coordinate geometry ( $g_z \sim g_e < (g_x, g_y)$ ,  $A_z \gg A_y \sim A_x$ ) and consistent with a  $d_{z^2}$  electronic ground state. Hyperfine coupling with the Cu nucleus ( $I = 3/2$ ) is resolved in the z-direction and the large  $A_z$  value (123.5 G) rules a trigonal bipyramidal coordination geometry.<sup>5,6</sup>

The EPR spectra recorded in acetonitrile/ $\text{H}_2\text{O}$  mixtures at 77 K (fig. S3), show magnetic interaction between molecules of complex. For  $[\text{Cu}(\text{dmp})_2(\text{CH}_3\text{CN})](\text{ClO}_4)_2$  g values calculated are  $g_x=2.106$ ,  $g_y=2.134$ ,  $g_z=2.162$ , and  $R=1.00$ . For  $[\text{Cu}(\text{phen})_2(\text{CH}_3\text{CN})](\text{ClO}_4)_2$  g values are  $g_x=2.064$ ,  $g_y=2.123$ ,  $g_z=2.189$ , and  $R=1.12$ . In both complexes, a change in the geometry and inversion of the g tensor values was observed ( $g_x < g_y < g_z$ ). probably due to the exchange of coordinated acetonitrile by water. The g parameters are typical for a  $\text{Cu}(\text{II})$  complexes in a predominantly axially elongated five-coordinate geometry with additional rhombic distortion ( $g_z > g_y > g_x$ ) and consistent with a  $d_{x^2-y^2}$  electronic ground state.<sup>6,8</sup>

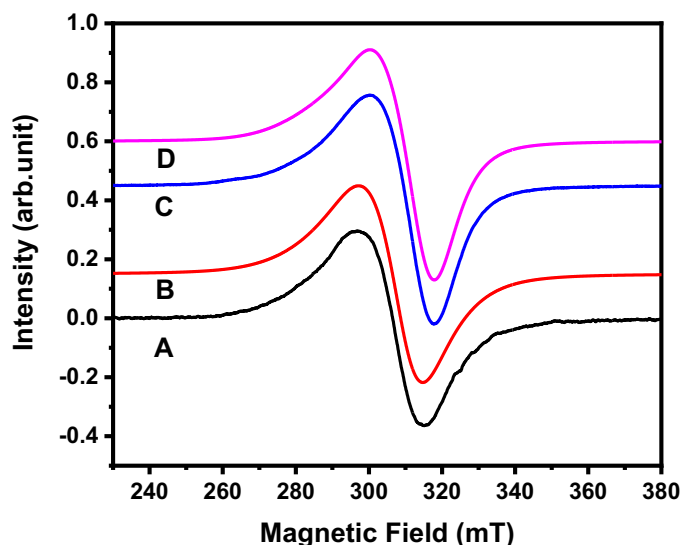

**Figure S3.** EPR spectra in acetonitrile/ $\text{H}_2\text{O}$  solution at 77 K (liquid nitrogen) of  $[\text{Cu}(\text{dmp})_2(\text{CH}_3\text{CN})](\text{ClO}_4)_2$  **A**) and  $[\text{Cu}(\text{phen})_2(\text{CH}_3\text{CN})](\text{ClO}_4)_2$  **C**). Spectral simulations **B** and **D**, were made with the EasySpin program<sup>2</sup> with the following EPR parameters: Freq.= 9.11009 GHz,  $g = [2.106 \ 2.134 \ 2.162]$ , Lw = [37.4 73.3] Gauss and Freq.= 9.11063 GHz,  $g = [2.064 \ 2.123 \ 2.189]$ , Lw = [49.9 49.2] Gauss, respectively.

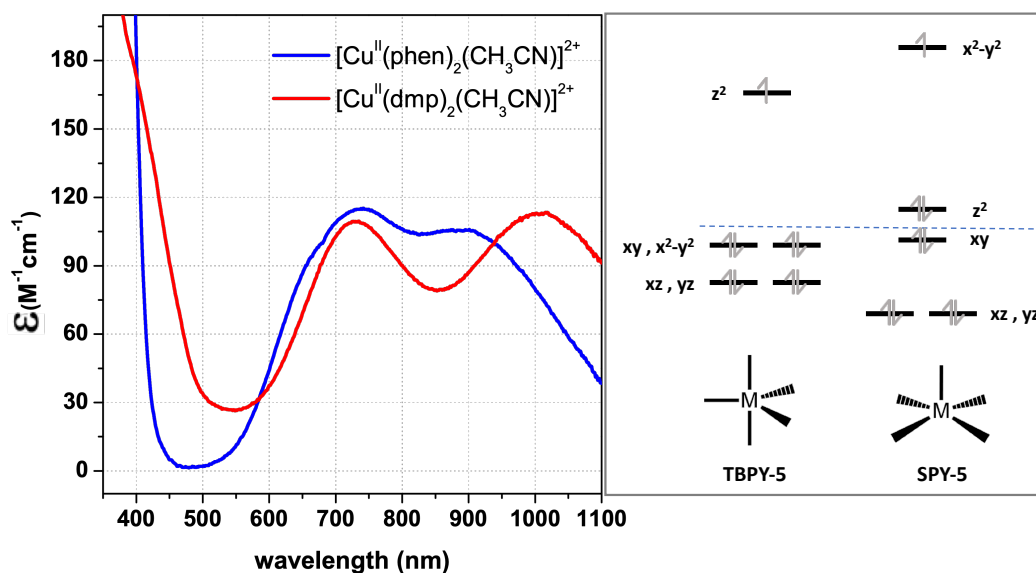

**Figure S4.** Left: Electronic spectra of  $[\text{Cu}(\text{dmp})_2(\text{CH}_3\text{CN})]^{2+}$  (red) and  $[\text{Cu}(\text{phen})_2(\text{CH}_3\text{CN})]^{2+}$  (blue), in the range of wavelengths where d-d transitions are observed. In the red spectrum, absorptions in the range 400-500 nm are due to the presence of a small amount of  $[\text{Cu}(\text{dmp})_2]^+$  produced by spontaneous reduction of the cupric complex. Right: Splitting of *d* orbitals for a pentacoordinated  $\text{Cu}^{\text{II}}$  ion ( $d^9$ ) in limit geometries of TBPY-5 and SPY-5, based on ligand field theory.

### Crystallographic information for $[\text{Cu}(\text{phen})_2(\text{CH}_3\text{CN})](\text{ClO}_4)_2$ and $[\text{Cu}(\text{dmp})_2](\text{ClO}_4)_2 \cdot \text{toluene}$ .

**Table S1.** Comparison of selected bonds distances (Å) and angles (deg).

| $[\text{Cu}(\text{phen})_2(\text{CH}_3\text{CN})]^{2+}$ | Bonds      | $[\text{Cu}(\text{dmp})_2]^+$ | Bonds      |
|---------------------------------------------------------|------------|-------------------------------|------------|
| Cu1-N1                                                  | 1.9808(12) | Cu(1)-N(1)#1                  | 2.021(2)   |
| Cu1-N2                                                  | 2.0848(12) | Cu(1)-N(2)#1                  | 2.040(3)   |
| Cu1-N1#                                                 | 1.9808(12) | Cu(1)-N(1)                    | 2.021(2)   |
| Cu1-N2#                                                 | 2.0848(12) | Cu(1)-N(2)                    | 2.040(3)   |
| Cu1-N3 (CH <sub>3</sub> CN)                             | 2.0644(18) |                               |            |
| $[\text{Cu}(\text{phen})_2(\text{CH}_3\text{CN})]^{2+}$ | Angles     | $[\text{Cu}(\text{dmp})_2]^+$ | Angles     |
| N2-Cu1-N2#                                              | 117.20 (6) | N(1)#1-Cu(1)-N(1)             | 127.41(12) |
| N3-Cu1-N2#                                              | 121.40 (3) | N(1)#1-Cu(1)-N(2)#1           | 82.96(11)  |
| N3-Cu1-N2                                               | 121.40 (3) | N(1)-Cu(1)-N(2)#1             | 120.40(10) |
| N1-Cu1-N2                                               | 81.67 (5)  | N(1)#1-Cu(1)-N(2)             | 120.40(10) |
| N1-Cu1-N2#                                              | 96.52 (5)  | N(1)-Cu(1)-N(2)               | 82.96(11)  |
| N1#-Cu1-N2#                                             | 81.67 (5)  | N(2)#1-Cu(1)-N(2)             | 128.70(14) |
| N1#-Cu1-N2                                              | 96.52 (5)  |                               |            |
| N1#-Cu1-N3                                              | 91.73 (3)  |                               |            |
| N1-Cu1-N3                                               | 91.73 (3)  |                               |            |
| N1-Cu1-N1#                                              | 176.55 (6) |                               |            |

**Table S2.** Crystallographic information.

|                                        |                                                                                       |                                                                   |
|----------------------------------------|---------------------------------------------------------------------------------------|-------------------------------------------------------------------|
| Compound                               | [Cu( <b>phen</b> ) <sub>2</sub> (CH <sub>3</sub> CN)](ClO <sub>4</sub> ) <sub>2</sub> | [Cu( <b>dmp</b> ) <sub>2</sub> ](ClO <sub>4</sub> ) · toluene     |
| Empirical formula                      | C <sub>26</sub> H <sub>19</sub> Cl <sub>2</sub> CuN <sub>5</sub> O <sub>8</sub>       | C <sub>35</sub> H <sub>32</sub> ClCuN <sub>4</sub> O <sub>4</sub> |
| Formula weight                         | 663.90 g/mol                                                                          | 671.63                                                            |
| Temperature                            |                                                                                       | 102(2) K                                                          |
| Wavelength                             | 0.71073 Å                                                                             | 0.71073 Å                                                         |
| Crystal system                         | Monoclinic                                                                            | Monoclinic                                                        |
| Space group                            | C2/c                                                                                  | C2/c                                                              |
| Unit cell dimensions                   | $a = 19.7424(10)$ Å, $\alpha = 90^\circ$                                              | $a = 16.062(2)$ Å $\alpha = 90^\circ$                             |
|                                        | $b = 8.6861(5)$ Å, $\beta = 98.024(2)^\circ$                                          | $b = 15.334(2)$ Å $\beta = 106.724(2)^\circ$                      |
|                                        | $c = 15.1100(8)$ Å, $\gamma = 90^\circ$                                               | $c = 13.3409(19)$ Å, $\gamma = 90^\circ$                          |
| Volume                                 | 2565.8(2) Å <sup>3</sup>                                                              | 3146.9(8) Å <sup>3</sup>                                          |
| Z                                      | 4                                                                                     | 4                                                                 |
| Density (calculated)                   | 1.719 g/cm <sup>3</sup>                                                               | 1.418 g.cm <sup>-3</sup>                                          |
| Absorption coefficient ( $\mu$ )       | 1.123 mm <sup>-1</sup>                                                                | 0.825 mm <sup>-1</sup>                                            |
| F(000)                                 | 1348                                                                                  | 1392                                                              |
| Crystal size                           | 0.228 x 0.323 x 0.403 mm <sup>3</sup>                                                 | 0.22 x 0.17 x 0.13 mm <sup>3</sup>                                |
| $\theta$ range for data collection     | 2.84 to 30.66°                                                                        | 1.88 to 26.84°                                                    |
| Index ranges                           | -24 $\leq h \leq$ 28, -12 $\leq k \leq$ 12, -21 $\leq l \leq$ 21                      | -20 $\leq h \leq$ 17, -19 $\leq k \leq$ 19, -16 $\leq l \leq$ 16  |
| Reflections collected                  | 22906                                                                                 | 11338                                                             |
| Independent reflections                | 3952 [ $R_{\text{int}} = 0.0343$ ]                                                    | 3346 [ $R_{\text{int}} = 0.0214$ ]                                |
| Completeness to $\theta = 27.00^\circ$ | 99.4%                                                                                 | 99.1 %                                                            |
| Absorption correction                  | Numerical                                                                             | Empirical                                                         |
| Max. and min. transmission             | 0.7169 and 0.5691                                                                     | 0.9004 and 0.8394                                                 |
| Refinement method                      | Full-matrix least-squares on $F^2$                                                    | Full-matrix least-squares on $F^2$                                |
| Data / restraints / parameters         | 3952 / 0 / 230                                                                        | 3346 / 0 / 226                                                    |
| Goodness-of-fit on $F^2$               | 1057                                                                                  | 1048                                                              |
| Final R indices [ $>2\sigma(I)$ ]      | $R_1 = 0.0326$ , $wR_2 = 0.0952$                                                      | $R_1 = 0.0471$ , $wR_2 = 0.1300$                                  |
| R indices (all data)                   | $R_1 = 0.0374$ , $wR_2 = 0.0999$                                                      | $R_1 = 0.0635$ , $wR_2 = 0.1437$                                  |
| Largest diff. peak and hole            | 0.360 and -0.771 e <sup>-</sup> Å <sup>-3</sup>                                       | 0.707 and -0.404 e <sup>-</sup> Å <sup>-3</sup>                   |

Spectral changes in acetonitrile solutions of  $[\text{Cu}(\text{dmp})_2(\text{CH}_3\text{CN})]^{2+}$  containing variable amounts of water.

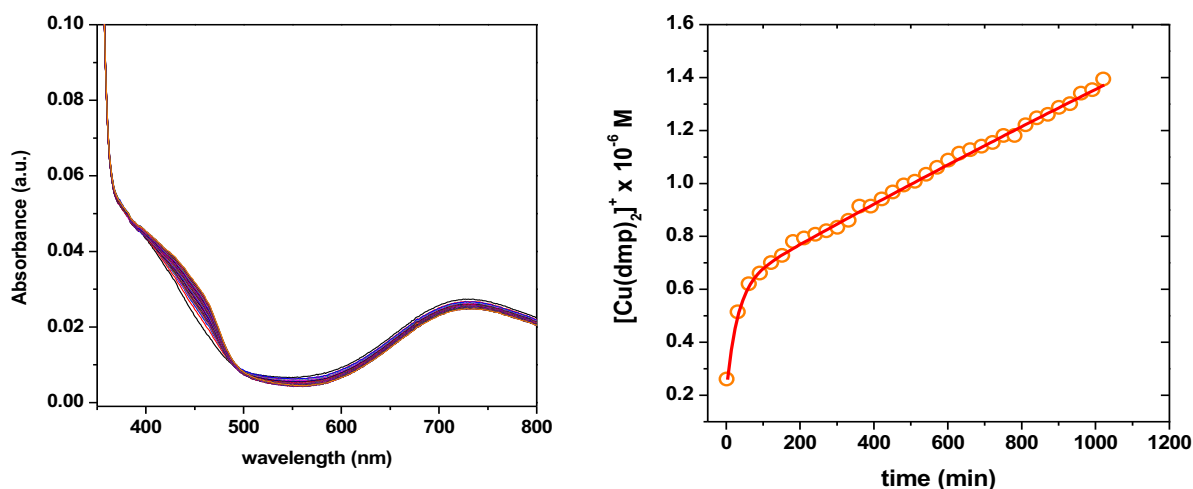

**Figure S5.** Spectral variation of  $[\text{Cu}(\text{dmp})_2(\text{CH}_3\text{CN})]^{2+} 2.5 \times 10^{-4} \text{ M}$  in acetonitrile (no added water). Kinetic profile of formation of  $[\text{Cu}(\text{dmp})_2]^+$  and biexponential decay fit. Calculated  $\tau_1 = 30.09 \text{ min}^{-1}$ ,  $\tau_2 = 7687.5 \text{ min}^{-1}$ .

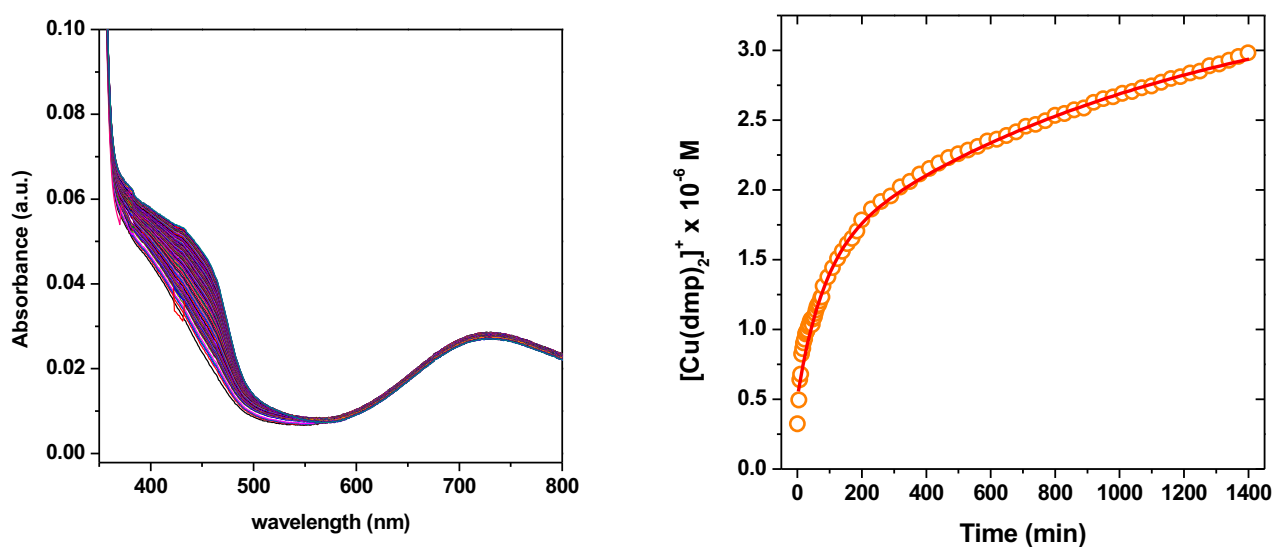

**Figure S6.** Spectral variation of  $[\text{Cu}(\text{dmp})_2(\text{CH}_3\text{CN})]^{2+} 2.5 \times 10^{-4} \text{ M}$  in acetonitrile + 10 equiv  $\text{H}_2\text{O}$ . Kinetic profile of formation of  $[\text{Cu}(\text{dmp})_2]^+$  and biexponential decay fit. Calculated  $\tau_1 = 79.57 \text{ min}^{-1}$ ,  $\tau_2 = 1150.2 \text{ min}^{-1}$ .

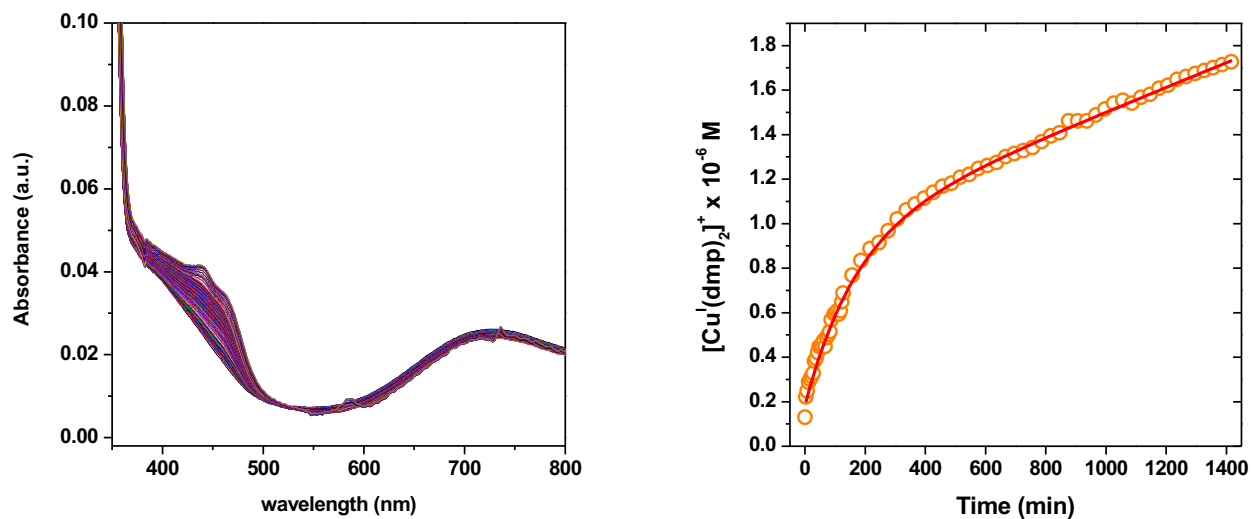

**Figure S7.** Spectral variation of  $[\text{Cu}(\text{dmp})_2(\text{CH}_3\text{CN})]^{2+} 2.5 \times 10^{-4} \text{ M}$  in acetonitrile + 30 equiv  $\text{H}_2\text{O}$ . Kinetic profile of formation of  $[\text{Cu}(\text{dmp})_2]^+$  and biexponential decay fit. Calculated  $\tau_1 = 165.38 \text{ min}^{-1}$ ,  $\tau_2 = 3.00 \times 10^7 \text{ min}^{-1}$ .

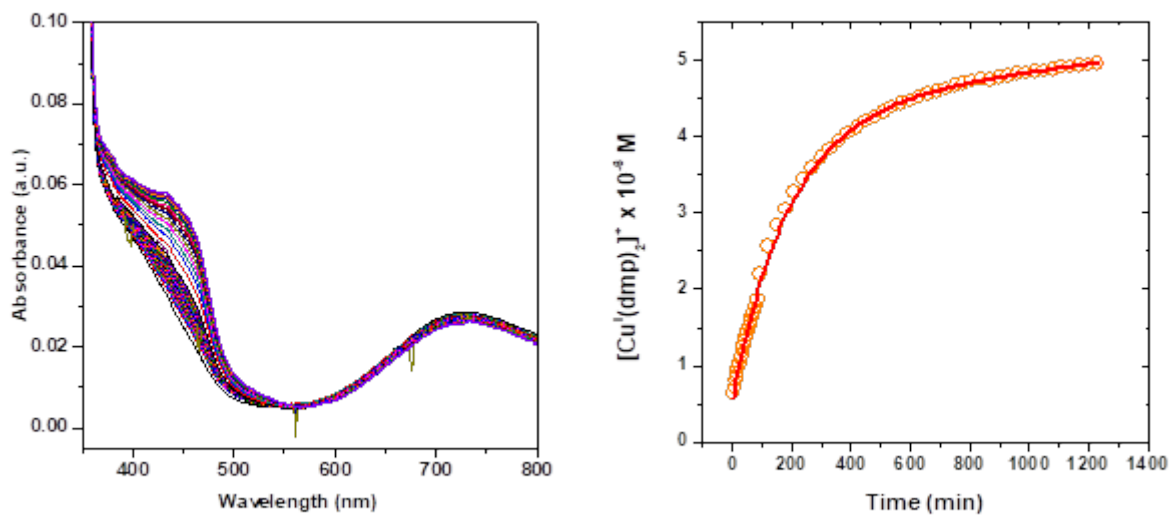

**Figure S8.** Spectral variation of  $[\text{Cu}(\text{dmp})_2(\text{CH}_3\text{CN})]^{2+} 2.5 \times 10^{-4} \text{ M}$  in acetonitrile + 50 equiv  $\text{H}_2\text{O}$ . Kinetic profile of formation of  $[\text{Cu}(\text{dmp})_2]^+$  and biexponential decay fit. Calculated  $\tau_1 = 189.8 \text{ min}^{-1}$ ,  $\tau_2 = 3.18 \times 10^4 \text{ min}^{-1}$ .

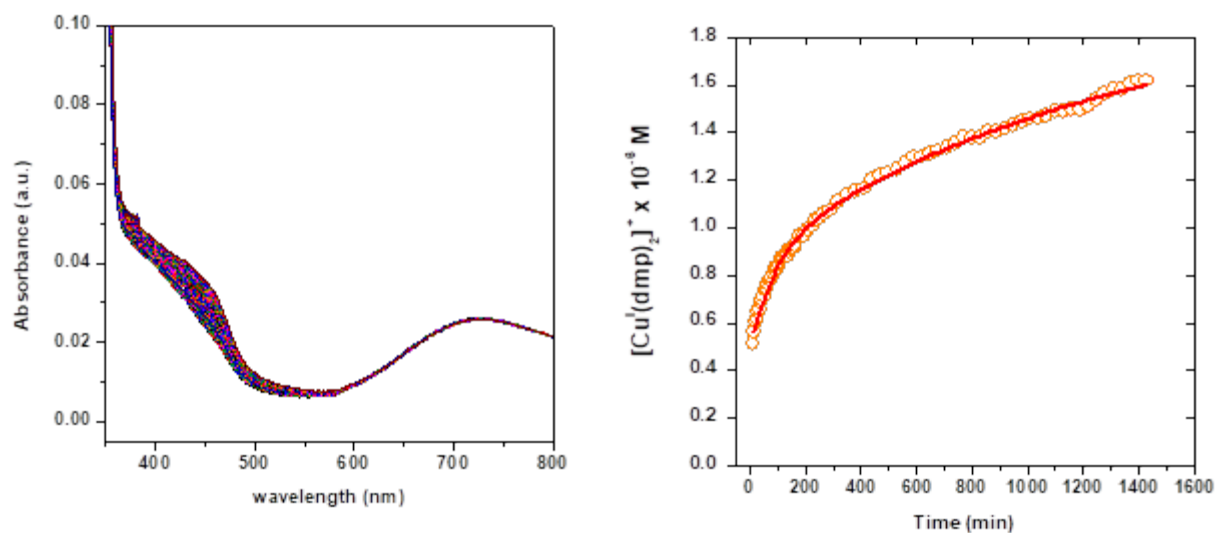

**Figure S9.** Spectral variation of  $[\text{Cu}(\text{dmp})_2(\text{CH}_3\text{CN})]^{2+} 2.5 \times 10^{-4} \text{ M}$  in acetonitrile + 80 equiv  $\text{H}_2\text{O}$ . Kinetic profile of formation of  $[\text{Cu}(\text{dmp})_2]^+$  and biexponential decay fit. Calculated  $\tau_1 = 98.38 \text{ min}^{-1}$ ,  $\tau_2 = 1333 \text{ min}^{-1}$ .

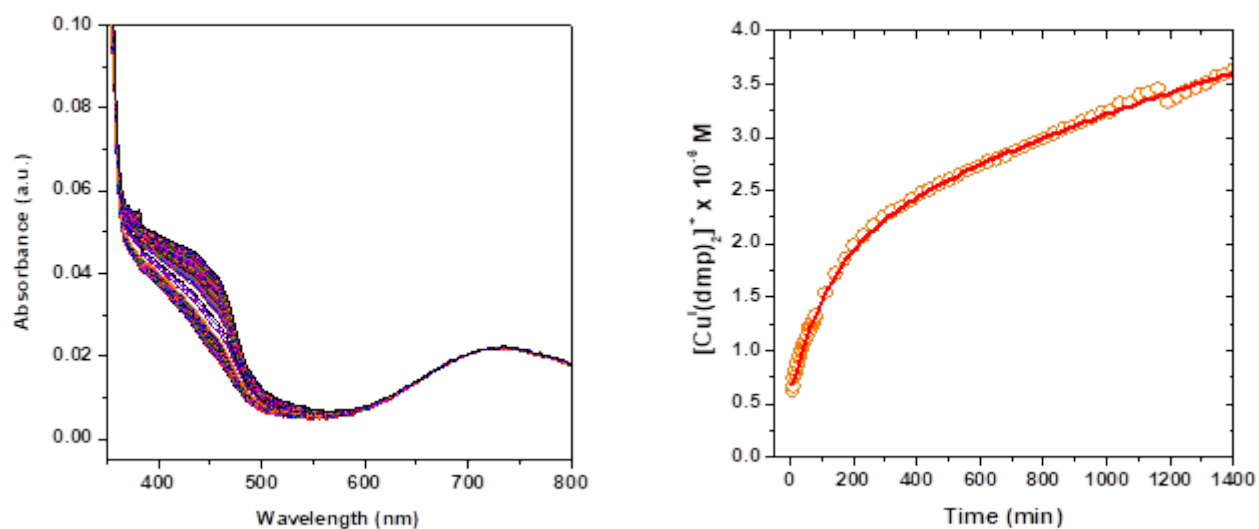

**Figure S10.** Spectral variation of  $[\text{Cu}(\text{dmp})_2(\text{CH}_3\text{CN})]^{2+} 2.5 \times 10^{-4} \text{ M}$  in acetonitrile + 100 equiv  $\text{H}_2\text{O}$ . Kinetic profile of formation of  $[\text{Cu}(\text{dmp})_2]^+$  and biexponential decay fit. Calculated  $\tau_1 = 121 \text{ min}^{-1}$ ,  $\tau_2 = 2163.7 \text{ min}^{-1}$ .



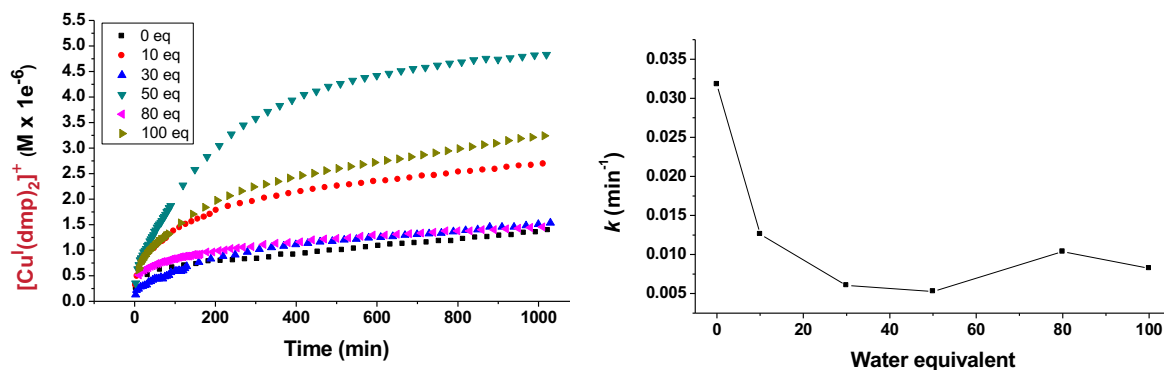

**Figure S11.** Left: Kinetic profile of formation of  $[\text{Cu}(\text{dmp})_2]^+$  at different amount of water, followed at  $\lambda_{\text{obs}}=456$  nm. Right: Rate constants of formation of  $[\text{Cu}(\text{dmp})_2]^+$  as a function of the equivalents of water.

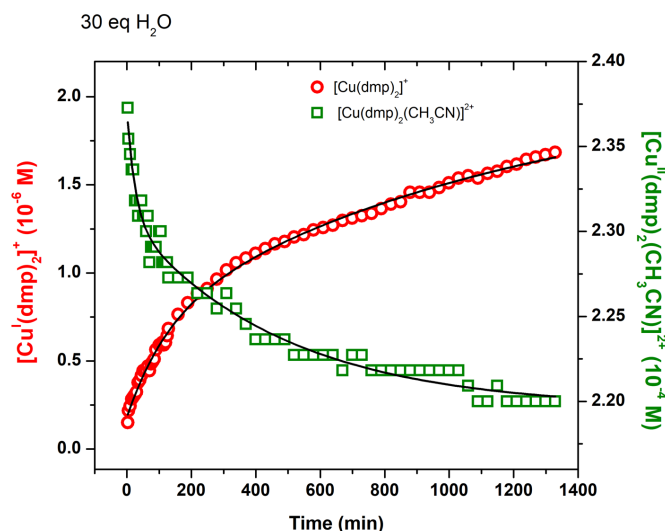

**Figure S12.** Kinetic profiles for the formation of  $[\text{Cu}(\text{dmp})_2]^+$  (red circles,  $\lambda_{\text{obs}}=456$  nm), and consumption of  $[\text{Cu}(\text{dmp})_2(\text{CH}_3\text{CN})]^{2+}$  (green squares,  $\lambda_{\text{obs}}=727$  nm), in an acetonitrile solution  $2.5 \times 10^{-4}$  M of  $[\text{Cu}(\text{dmp})_2(\text{CH}_3\text{CN})]^{2+}$  after addition of 30 eq of water. A biexponential equation was used to fit both profiles (black curves).

**Table S3.** Observed rate constants calculated by biexponential fit of the formation of  $[\text{Cu}(\text{dmp})_2]^+$  and decay of  $[\text{Cu}(\text{dmp})_2(\text{CH}_3\text{CN})]^{2+}$  (figure 1). Variation in the concentration of each species was calculated at 1200 min of reaction, being (+) formation and (-) decrease from the initial concentration of complex.

| + 30 eq H <sub>2</sub> O                               | $k_{\text{obs 1}}$   | $k_{\text{obs 2}}$   | Variation in the complex concentration after 1200 min |
|--------------------------------------------------------|----------------------|----------------------|-------------------------------------------------------|
| $[\text{Cu}(\text{dmp})_2]^+$                          | $8.1 \times 10^{-3}$ | $8.7 \times 10^{-4}$ | (+) $1.6 \times 10^{-6}$ M                            |
| $[\text{Cu}(\text{dmp})_2(\text{CH}_3\text{CN})]^{2+}$ | $3.9 \times 10^{-2}$ | $2.1 \times 10^{-3}$ | (-) $1.7 \times 10^{-5}$ M                            |

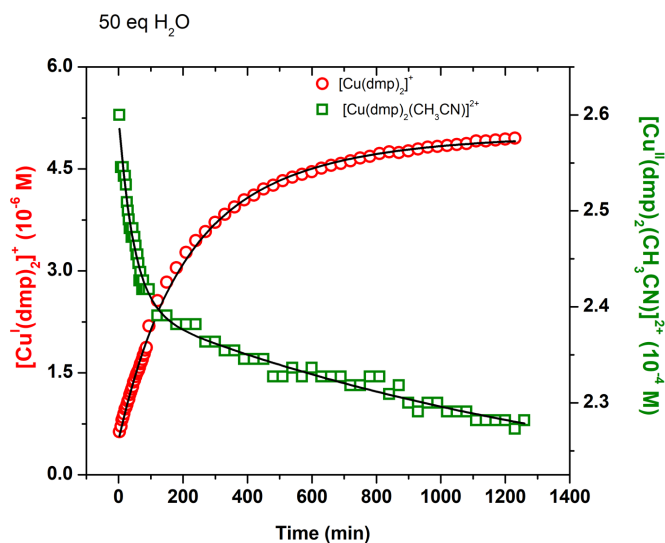

**Figure S13.** Kinetic profiles for the formation of  $[\text{Cu}(\text{dmp})_2]^+$  (red circles,  $\lambda_{\text{obs}}=456 \text{ nm}$ ), and consumption of  $[\text{Cu}(\text{dmp})_2(\text{CH}_3\text{CN})]^{2+}$  (green squares,  $\lambda_{\text{obs}}=727 \text{ nm}$ ), in an acetonitrile solution  $2.5 \times 10^{-4} \text{ M}$  of  $[\text{Cu}(\text{dmp})_2(\text{CH}_3\text{CN})]^{2+}$  after addition of 50 eq of water. A biexponential equation was used to fit both profiles (black curves).

**Table S4.** Observed rate constants calculated by biexponential fit of the formation of  $[\text{Cu}(\text{dmp})_2]^+$  and decay of  $[\text{Cu}(\text{dmp})_2(\text{CH}_3\text{CN})]^{2+}$  (figure 1). Variation in the concentration of each species was calculated at 1200 min of reaction, being (+) formation and (-) decrease from the initial concentration of complex.

| + 50 eq H <sub>2</sub> O                               | $k_{\text{obs } 1}$  | $k_{\text{obs } 2}$  | Variation in the complex concentration after 1200 min |
|--------------------------------------------------------|----------------------|----------------------|-------------------------------------------------------|
| $[\text{Cu}(\text{dmp})_2]^+$                          | $6.8 \times 10^{-3}$ | $2.7 \times 10^{-3}$ | (+) $4.9 \times 10^{-6} \text{ M}$                    |
| $[\text{Cu}(\text{dmp})_2(\text{CH}_3\text{CN})]^{2+}$ | $2.2 \times 10^{-2}$ | $6.6 \times 10^{-4}$ | (-) $3.2 \times 10^{-5} \text{ M}$                    |

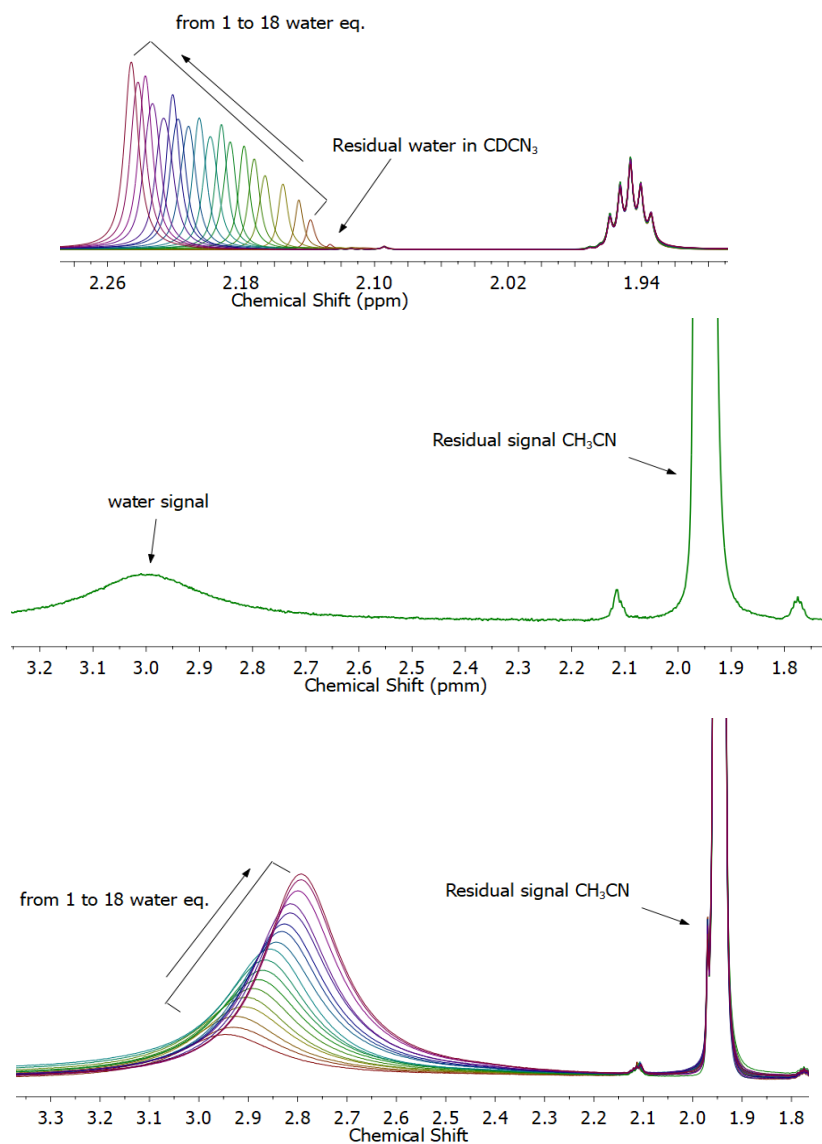

**Figure S14.** Above:  $^1\text{H}$ -NMR spectra of  $\text{CD}_3\text{CN}$  with additions of water (without complex). Center:  $^1\text{H}$ -NMR spectra of an  $\text{CD}_3\text{CN}$  solution of  $[\text{Cu}(\text{dmp})_2(\text{CH}_3\text{CN})](\text{ClO}_4)_2$ . Below:  $^1\text{H}$ -NMR spectra of an  $\text{CD}_3\text{CN}$  solution of  $[\text{Cu}(\text{dmp})_2(\text{CH}_3\text{CN})](\text{ClO}_4)_2$  with additions of equivalent amounts of water.

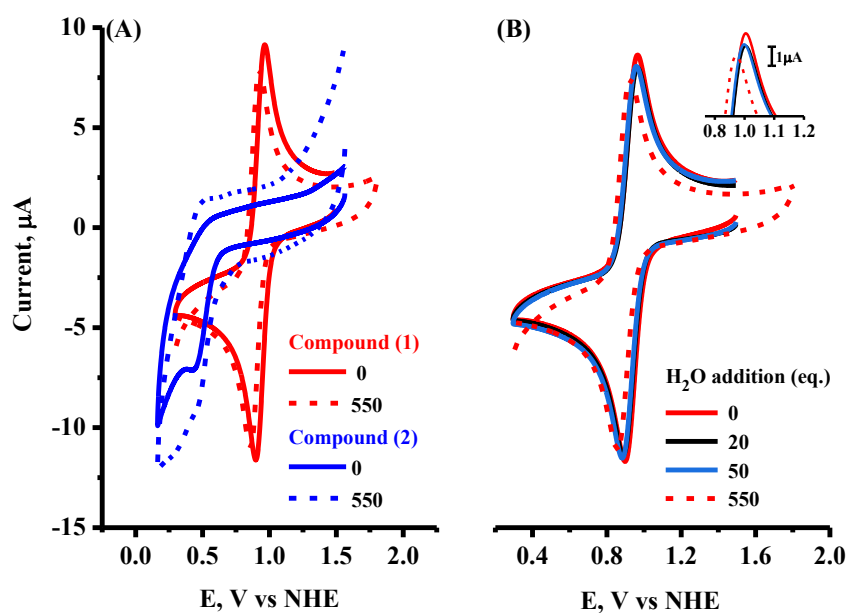

**Figure S15.** Cyclic voltammograms (CVs) at 100 mV s<sup>-1</sup> in acetonitrile containing 0.1 mol L<sup>-1</sup> TBAP and 0.001 mol L<sup>-1</sup> solutions of [Cu(dmp)<sub>2</sub>(CH<sub>3</sub>CN)]<sup>2+</sup> (compound 1) and [Cu(phen)<sub>2</sub>(CH<sub>3</sub>CN)]<sup>2+</sup> (compound 2). Panel (A): CVs obtained before (solid lines) and after (dashed lines) addition of 550 equivalents of water. Panel (B): CVs during water addition in the solution containing [Cu(dmp)<sub>2</sub>(CH<sub>3</sub>CN)]<sup>2+</sup> after addition of different amount of water, as indicated. Inset: zoom in to show the potential shifts of the oxidative peaks during water addition.

**Table S5.** Shape measurements for the Cu-N<sub>4</sub> core in [Cu(dmp)<sub>2</sub>(CH<sub>3</sub>CN)]<sup>2+</sup> and [Cu(phen)<sub>2</sub>(CH<sub>3</sub>CN)]<sup>2+</sup> with no coordinated CH<sub>3</sub>CN, and [Cu(dmp)<sub>2</sub>]<sup>+</sup>.

| Compound (CCDC deposition number)                          | SP-4   | vTBPY-4 | T-4    | SS-4  | Reference |
|------------------------------------------------------------|--------|---------|--------|-------|-----------|
| [Cu(dmp) <sub>2</sub> (CH <sub>3</sub> CN)] <sup>2+</sup>  | 16.755 | 8.239   | 9.408  | 2.784 | this work |
| [Cu(dmp) <sub>2</sub> (CH <sub>3</sub> CN)] <sup>2+</sup>  | 16.699 | 8.390   | 9.239  | 2.654 | 1         |
| [Cu(phen) <sub>2</sub> (CH <sub>3</sub> CN)] <sup>2+</sup> | 9.277  | 14.124  | 13.838 | 3.212 | this work |
| [Cu(dmp) <sub>2</sub> ] <sup>+</sup>                       | 22.356 | 8.632   | 5.474  | 8.278 | this work |
| [Cu(dmp) <sub>2</sub> ] <sup>+</sup> (278537)              | 21.923 | 8.254   | 5.787  | 8.494 | 9         |
| [Cu(dmp) <sub>2</sub> ] <sup>+</sup> (278538)              | 25.156 | 8.451   | 5.487  | 9.511 | 9         |
| [Cu(dmp) <sub>2</sub> ] <sup>+</sup> (228941)              | 25.227 | 7.347   | 5.343  | 8.493 | 10        |
| [Cu(dmp) <sub>2</sub> ] <sup>+</sup> (228942)              | 21.962 | 7.580   | 6.176  | 7.019 | 10        |
| [Cu(dmp) <sub>2</sub> ] <sup>+</sup> (228943)              | 23.022 | 8.041   | 5.779  | 8.033 | 10        |
| [Cu(dmp) <sub>2</sub> ] <sup>+</sup> (228944)              | 21.119 | 8.215   | 6.201  | 7.960 | 10        |
| [Cu(dmp) <sub>2</sub> ] <sup>+</sup> (228945)              | 20.344 | 7.855   | 6.650  | 7.587 | 10        |
| [Cu(dmp) <sub>2</sub> ] <sup>+</sup> (228947)              | 20.436 | 8.172   | 6.041  | 7.422 | 10        |
| [Cu(dmp) <sub>2</sub> ] <sup>+</sup> (228948)              | 24.907 | 8.041   | 5.300  | 8.838 | 10        |
| [Cu(dmp) <sub>2</sub> ] <sup>+</sup> (228949)              | 24.609 | 8.050   | 5.420  | 9.113 | 10        |
| [Cu(dmp) <sub>2</sub> ] <sup>+</sup> (228950a)             | 21.935 | 8.010   | 6.124  | 7.361 | 10        |
| [Cu(dmp) <sub>2</sub> ] <sup>+</sup> (228950b)             | 25.875 | 7.429   | 5.824  | 7.108 | 10        |
| [Cu(dmp) <sub>2</sub> ] <sup>+</sup> (228951)              | 17.856 | 9.141   | 6.527  | 7.075 | 10        |

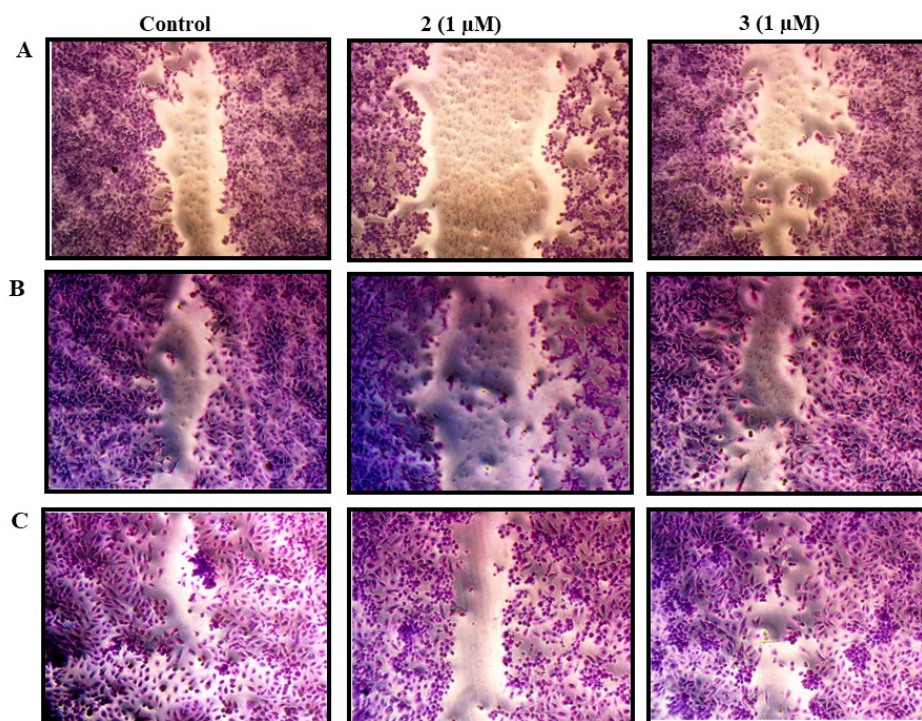

**Figure S16.** Wound healing assay. (A) MG-63, (B) A549 and (C) MDA-MB-231.

## References

- 1 V. Leandri, Q. Daniel, H. Chen, L. Sun, J. M. Gardner and L. Kloo, *Inorg. Chem.* 2018, 57, 4556–4562.
- 2 S. Stoll and A. Schweiger, *J. Magn. Reson.* 2006, 178, 42–55.
- 3 E. Garribba and G. Micera, *J. Chem. Educ.* 2006, 83, 1229–1232.
- 4 B. J. Hathaway and A. G. Tomlinson, *Coord. Chem. Rev.* 1970, 5, 1–43.
- 5 Y. Yao, M. W. Perkovic, D. P. Rillema and C. Woods, *Inorg. Chem.* 1992, 31, 3956–3962.
- 6 M. Pitié, C. Boldron, H. Gornitzka, C. Hemmert, B. Donnadieu and B. Meunier, *Eur. J. Inorg. Chem.* 2003, 528–540.
- 7 A. I. B. Romo, D. S. Abreu, T. de F. Paulo, M. S. P. Carepo, E. H. S. Sousa, L. Lemus, C. Aliaga, A. A. Batista, O. R. Nascimento, H. D. Abruña and I. C. N. Diógenes, *Chem. - A Eur. J.* 2016, 22, 10081–10089.
- 8 A. I. B. Romo, V. S. Dibo, D. S. Abreu, M. S. P. Carepo, A. C. Neira, I. Castillo, L. Lemus, O. R. Nascimento, P. V. Bernhardt, E. H. S. Sousa and I. C. N. Diógenes, *Dalton Trans.* 2019, 48, 14128–14137.
- 9 G. King, M. Gembicky and P. Coppens, *Acta Crystallogr. Sect. C Cryst. Struct. Commun.* 2005, 61, 329–332.
- 10 A. Y. Kovalevsky, M. Gembicky, I. V. Novozhilova and P. Coppens, *Inorg. Chem.* 2003, 42, 8794–8802.
